1 **Compartment and cell type-specific hypoxia responses**  
2 **in the developing *Drosophila* brain**

3

4 Martin Baccino-Calace<sup>1,2</sup>, Daniel Prieto<sup>1</sup>, Rafael Cantera<sup>1,3</sup>, Boris Egger<sup>4\*</sup>

5

6

7

8

9

10

11

12

13

14

15

16

17

18

19

20

21 1 Developmental Neurobiology, Instituto de Investigaciones Biológicas Clemente  
22 Estable, Montevideo 11600, Uruguay.

23 2 Current address: Institute of Molecular Life Sciences, University of Zürich, Zurich CH-  
24 8057, Switzerland.

25 3 Zoology Department, Stockholm University, Stockholm 106 91, Sweden.

26 4 Department of Biology, University of Fribourg, Fribourg CH-1700, Switzerland.

27

28 \*Author for correspondence ([boris.egger@unifr.ch](mailto:boris.egger@unifr.ch))

29

30 **ABSTRACT**

31

32 Environmental factors such as the availability of oxygen are instructive cues to regulate  
33 stem cell maintenance and differentiation. We used a genetically encoded biosensor to  
34 monitor the hypoxic state of neural cells in the larval brain of *Drosophila*. The biosensor  
35 reveals brain compartment and cell type specific levels of hypoxia. The values correlate  
36 with differential tracheolation that is observed throughout development between the  
37 central brain and the optic lobe. Neural stem cells in both compartments show the  
38 strongest hypoxia response while intermediate progenitors, neurons and glial cells  
39 reveal weaker responses. We demonstrate that the distance between a cell and the  
40 next closest tracheole is a good predictor of the hypoxic state for that cell. Our model  
41 concludes that oxygen availability is the major factor controlling the hypoxia response  
42 in the developing *Drosophila* brain but cell intrinsic and cell-type specific factors  
43 contribute to modulate the response in an unexpected manner.

## 44 INTRODUCTION

45 In stem cell niches the supply of oxygen and nutrients is tightly controlled (Schofield,  
46 1978; Morrison and Spradling, 2008) and the stem cell microenvironment ensures a  
47 balanced response of stem cells to the needs of the organism (Li and Xie, 2005;  
48 Scadden, 2006; Jones and Wagers, 2008). It was reported that embryonic,  
49 hematopoietic, neural and cancer stem cells reside in hypoxic niches (Ezashi et al.,  
50 2005; Simon and Keith, 2008; Mohyeldin et al., 2010; Simsek et al., 2010; Takubo et  
51 al., 2010; Lee and Simon, 2012) and that hypoxia favours survival, maintenance and  
52 proliferation of stem cells *in vitro* and *in vivo* (Csete, 2005; Carnero and Leonart,  
53 2016).

54 The first studies reporting a functional relationship between neural precursor cells and  
55 hypoxia was performed in the carotid body, where glomus cells showed increased  
56 survival and proliferation in response to hypoxia (Bee et al., 1986; Nurse and Vollmer,  
57 1997; Pardal et al., 2007). Hypoxia increases multipotency, proliferation and selective  
58 survival of neural stem cells. On the contrary, exposing stem cells to atmospheric  
59 oxygen causes differentiation and cell death (Studer et al., 2000; Storch et al., 2001;  
60 Gustafsson et al., 2005; Pardal et al., 2007; Panchision, 2009). More recently, Lange  
61 and colleagues demonstrated that the relief of tissue hypoxia by ingrowing blood  
62 vessels is an instructive signal for neural stem cell differentiation in the developing  
63 cerebral cortex (Lange et al., 2016).

64 In the *Drosophila* embryo a fully functional nervous system is built within a few hours of  
65 embryonic development, which serves the freshly hatched larva among other  
66 behaviours to navigate and feed. During larval growth, a second wave of neurogenesis  
67 is initiated to produce the neurons for the adult central brain and the ganglia of the optic  
68 lobes (Truman and Bate, 1988; Hofbauer and Campos-Ortega, 1990; Green et al.,  
69 1993; Meinertzhagen and Hanson, 1993; Hartenstein et al., 2008). As the stem cells of  
70 the optic lobes proliferate, their progenies await in an arrested state of differentiation for  
71 several days before they become fully differentiated and form synaptic connections in  
72 mid-pupal life (Melnattur and Lee, 2011; Chen et al., 2014). Hence, in the larval optic  
73 lobe proliferating progenitor cells co-exist during several days with postmitotic cells that  
74 remain in a state of arrested differentiation.

75 As the nervous system develops in the embryo, tracheal cells invade the brain along  
76 the dorsal midline and build the network of respiratory tubes, called tracheoles that  
77 oxygenate the brain during larval life. In *Drosophila* these air tubes have a stereotyped  
78 branching pattern, making it possible to draw a detailed map of the larger tracheoles  
79 reaching each brain region (Pereanu et al., 2007). The present study was prompted by  
80 the observation that in the developing larval brain tracheoles are not distributed as

81 homogeneously and densely as in muscle, ovary, intestine and other tissues with high  
82 metabolism (Bownes, 1982; Li et al., 2013; Peterson and Krasnow, 2015; Misra et al.,  
83 2017). In the larval brain the tracheal network is largely segregated into two main  
84 compartments. A central region, where the functional neuronal circuits are located, is  
85 densely tracheolated. However, to each side of the central brain there is a large  
86 compartment containing very few tracheoles (Misra et al., 2017). These lateral regions  
87 correspond to the proliferative anlagen of the optic lobes (White and Kankel, 1978;  
88 Hofbauer and Campos-Ortega, 1990).

89 Our main hypotheses are that the sparse tracheolation of the optic lobes is an essential  
90 aspect of normal brain development because it results in a state of constitutive  
91 hypoxia, relative to the central brain, which in turn will promote proliferation and inhibit  
92 differentiation of the newly formed neurons. Quantitative data obtained with a hypoxia  
93 biosensor supports the notion that the optic lobe is less oxygenated than the central  
94 brain (Misra et al., 2017).

95 Here we mapped the hypoxic states of different brain regions throughout larval  
96 development and found that the proliferative anlagen of the optic lobes show elevated  
97 hypoxia levels as compared to the densely tracheolated and synaptically active central  
98 brain. The high spatial resolution of the biosensor made it possible to detect consistent  
99 differences in the hypoxia values assigned to cells located very close to each other,  
100 and evidence is presented for cell type-specific hypoxia responses. We analysed the  
101 relationship between tracheolation and the hypoxia response revealed by the  
102 biosensor. Interestingly, we find that the minimum distance between a cell and the next  
103 tracheole is a good predictor of the hypoxic state of that cell. Finally, we provide  
104 evidence that neural progenitor cells respond to altered ambient oxygen levels in a cell-  
105 type specific manner. We conclude that this knowledge opens the opportunity to use  
106 *Drosophila* for the study of how hypoxia regulates stem cell proliferation and neuronal  
107 differentiation. Knowing what factors control the co-existence of proliferating tissue  
108 within a differentiated organ such as the brain is also of interest for studying tumour  
109 formation and maintenance.

110

111

## 112 **RESULTS**

### 113 **Differential tracheolation persists throughout larval development**

114 In the developing larva of *Drosophila*, the central brain is much more densely  
115 tracheolated than the optic lobe. Using a novel hypoxia biosensor, we found that  
116 towards the end of larval life this asymmetry in the density of tracheoles correlates with  
117 asymmetry in hypoxia levels, with the optic lobe being less oxygenated than the central



118 brain (Pereanu et al., 2007; Misra et al., 2017). Here, we used confocal laser  
119 microscopy and transmission electron microscopy to further define this morphological  
120 and functional dichotomy and investigated whether this condition prevails throughout  
121 larval development. In brains immunolabelled for the synaptic marker Bruchpilot (Brp)  
122 (Kittel et al., 2006; Wagh et al., 2006) the staining co-localizes with regions of the brain  
123 that are densely tracheolated (Figure 1A, B) and that correspond almost entirely to the  
124 synaptic centres (i.e. neuropils, see for example (Iyengar et al., 2006)). In contrast,  
125 very little synaptic staining was found within the optic lobes (Figure 1B). Hence, there is  
126 a close topographic correlation between a dense tracheolation of the synaptic neuropil  
127 in the central brain and a sparse tracheolation in the optic lobes, where there are no  
128 synapses but instead undifferentiated progenitor cells (Figure 1C). A close examination  
129 of the border between these two brain regions, using transmission electron microscopy  
130 disclosed the existence of a sharp interphase between two types of cell bodies (inset in  
131 Figure 1C and 1D). On the side of the central brain we found glia, tracheoles and  
132 neuronal cell bodies extending thick neurites into the neuropil where they formed  
133 synapses (not shown). These cell bodies had a relatively large cytoplasm containing  
134 abundant mitochondria, endoplasmic reticulum, ribosomes and other organelles, as  
135 expected for differentiated neurons (Figure 1E). On the opposite side (Figure 1F),  
136 within the medial region of the optic lobes, we found large numbers of smaller cells, in  
137 which the nucleus was surrounded by a thin ring of cytoplasm, with fewer organelles  
138 and with the typical columnar arrangement of the yet not fully differentiated neuronal  
139 progeny generated in this proliferative region (Meinertzhagen and Hanson, 1993;  
140 Fischbach and Hiesinger, 2008; Hasegawa et al., 2011; Melnattur and Lee, 2011).  
141 We previously reported that at a late stage of larval development, 96 hrs after larval  
142 hatching (ALH), the sparsely tracheolated optic lobe has lower hypoxia values than the  
143 densely tracheolated central brain (Misra et al., 2017). To investigate if this condition is  
144 specific for the end of larval life or prevails during a longer developmental interval and  
145 is thus of potential relevance for brain development we extended our analysis to seven  
146 time points of larval development at 12 hr intervals, from 24 to 96 hrs ALH. We found  
147 that the segregation of tracheoles exists already by 24 hrs ALH (Figure 2A) and  
148 persists throughout larval life (Figure 2A-F). We confirmed that the optic lobe grows in  
149 size during this time (Figure 2G) (mean values in  $\mu\text{m}^3$ , 24hrs: 28206.5, 36hrs:  
150 105438.5, 48hrs: 85418.4, 60hrs: 381289.3, 72hrs: 1696572.2, 84hrs: 1909378.7,  
151 96hrs: 2271840.1, n=4, 6, 6, 6, 5, 6, respectively). We observed that also the  
152 tracheoles grow considerably in overall length (Fig. 2H; values in  $\mu\text{m}$ , 24hrs: 76.2.,  
153 36hrs: 144.7, 48hrs: 266.8, 60hrs: 503.0, 72hrs: 625.3, 84hrs: 511.6, 96hrs: 684.3)  
154 although not enough to compensate for optic lobe growth from 48h ALH onwards, and

155 thus the proportion of optic lobe tissue devoid of tracheoles appears to increase with  
156 age (Figure 2I).

157

### 158 **Oxygen availability triggers differential hypoxia response between central brain** 159 **and optic lobe**

160 Since our original hypothesis stated that the sparse tracheolation of the optic lobes will  
161 result in a condition of chronic hypoxia relative to the central brain, we used a HIF-  
162 1 $\alpha$ /Sima based hypoxia sensor (Misra et al., 2017) to monitor hypoxia in these two  
163 brain compartments throughout larval life. The results were consistent with this  
164 prediction because mean biosensor ratiometric values were significantly lower for the  
165 optic lobe (stronger hypoxia response) as compared to the central brain at 36, 60 and  
166 84 hrs ALH (Figure 3; mean ratiometric values at 36 hrs: 0.90 for central brain, 1.23 for  
167 optic lobe, n=6; at 60 hrs ALH: 0.89 for central brain, 1.22 for optic lobe, n=6; at 84 hrs  
168 ALH, 0.90 for central brain, 1.31 for optic lobe, n=8). Our results presented here so far  
169 strongly suggest that the dense tracheolation of the central brain results in higher  
170 oxygenation of this compartment in comparison with the sparsely tracheolated optic  
171 lobe.

172

### 173 **The distance between a cell and its nearest tracheole can predict its cellular** 174 **hypoxia response**

175 To further investigate the relationship between tracheolation and the distribution of  
176 oxygen in the brain we decided to focus on the lateral optic lobe tracheole (OLTI)  
177 described by Poreanu and collaborators (Poreanu et al., 2007), which enters the optic  
178 lobe through the inner proliferation center (IPC). The spatial separation of the OLTI  
179 from other tracheoles provides a good opportunity to analyse how oxygen availability  
180 and hypoxic response values change within a group of similar cells, which only differ in  
181 their distance to a neighbouring tracheole. Our measurements indicate that as the  
182 minimal distance between cells and OLTI increases, hypoxia values increase. It  
183 suggests that oxygen availability decreases (Figure 4). The data (1/Ratio as a function  
184 of distance) best fits a decaying exponential function of the shape:

185

$$186 \quad 1/Ratio = y_0 + A \cdot e^{\left(\frac{x-x_0}{\lambda}\right)}$$

187

188 (Figure 4B). The study of the OLTI tracheole provided key insights into the way oxygen  
189 diffuses from a given tracheole and prompted us to apply the same analysis in a  
190 generalized way to the entire brain hemisphere. We produced a map that contains the

191 coordinates of every cell in the brain and measured the minimum distance between  
192 each cell and neighbouring tracheoles in the entire brain. 1/Ratio values plotted as a  
193 function of minimum distance to trachea show an inverse relationship that is best fitted  
194 by a decaying exponential function (Figure 4C and 4D). The result demonstrates that  
195 the hypoxia response of individual cells correlates with their position in the brain in  
196 relation to the tracheal system. Using the best fit exponential function, we predicted  
197 ratiometric values according to cell-to-tracheole distance and depicted them with a  
198 colour scale in a heat map (Figure 4E). The image strongly resembles the distribution  
199 of measured ratiometric values (compare Figure 4E to 4A), which indicates that the  
200 distance to tracheoles can reliably predict the hypoxic, or conversely, the oxygenation  
201 state of cells.

202 However, the biosensor might not distinguish between the contribution of oxygen  
203 availability and other factors that affect HIF-1 $\alpha$ /Sima and ODD-GFP degradation. In  
204 order to demonstrate that oxygen is the main determinant of the differences of  
205 ratiometric values, we subjected larvae to altered ambient oxygen conditions (Figure  
206 5). We exposed larvae to increased atmospheric oxygen levels (hyperoxia) by raising  
207 them in 60% oxygen from 24 hrs to 84 hrs ALH (Figure 5A-C). The results were  
208 consistent with an increase in oxygen dependent degradation of GFP-ODD in the optic  
209 lobe, relative to the central brain, indicating enhanced oxygen availability. The  
210 frequency distribution of ratiometric values showed that optic lobe values were shifted  
211 towards central brain values as compared with brains from larvae kept in normoxia  
212 (compare Figure 5B and 3F). Hence, the difference in the average hypoxia response  
213 between the central brain and the optic lobe decreased significantly upon ambient  
214 hyperoxia (Figure 5B'; mean ratiometric values for central brain in normoxia: 0.89, optic  
215 lobe in normoxia: 1.32; central brain in hyperoxia: 0.55, optic lobe in hyperoxia: 0.61,  
216 n=7). Under these conditions, cells of the central brain and optic lobe seem to  
217 experience similar oxygen levels despite the persistence of unequal tracheolation in  
218 these two compartments (Figure 5A, A'). The decay kinetics of oxygen levels (1/Ratio)  
219 in relation to distance to tracheoles was reduced, which indicates oxygen saturation of  
220 the brain and the loss of the difference between central brain and optic lobe (Figure 5C;  
221 normoxia: black curve,  $\lambda$ : 242  $\mu$ m, hyperoxia; blue line,  $\lambda$ : 653  $\mu$ m).

222 Next, we exposed larvae to ambient hypoxia by raising them in 5% oxygen from 60 hrs  
223 to 84 hrs ALH in order to investigate whether the sensor is able to show decreased  
224 oxygen availability in the brain. We observed an increase in ratiometric values in both  
225 central brain and optic lobe compartments (Figure 5D, E'). The difference in the  
226 average hypoxia response between central brain and optic lobe increased significantly  
227 in larvae kept for 24 hrs in ambient hypoxia (Figure 5E'; mean ratiometric values for

228 central brain in normoxia: 0.89, optic lobe in normoxia: 1.3, central brain in hypoxia:  
229 1.25, optic lobe in hypoxia: 1.86, n=7). The relationship between oxygenation (1/Ratio)  
230 and distance to tracheoles remained unchanged compared to normoxia (Figure 5F;  
231 normoxia: black curve,  $\lambda$ : 242  $\mu\text{m}$  hypoxia: red line,  $\lambda$ : 414  $\mu\text{m}$ ).

232 Overall these results support the notion that the differences in ratiometric values  
233 observed in our experiments are predominantly due to oxygen tensions and not  
234 regulated by other factors influencing HIF-1 $\alpha$ /Sima degradation. However, closely  
235 studying the map of hypoxia-response predicted values (Figure 4E) we noticed that for  
236 certain cell types these predicted values deviated from the measured values (Figure  
237 4A). We therefore analysed the hypoxia response in more detail by analysing the  
238 biosensor in a cell type specific manner

239

#### 240 **Biosensor reveals cell-type specific hypoxia states in central brain and optic** 241 **lobe**

242 The results of our brain-compartment analysis prompted us to investigate the hypoxia  
243 response in different cell types found in the central brain and in the optic lobe (Figure  
244 6). For this we combined the ratiometric analysis with immunofluorescence labelling for  
245 cell type specific nuclear marker proteins. We marked neuroblasts with an antibody  
246 against Deadpan (Dpn), ganglion mother cells (GMCs) with an antibody against  
247 Prospero (Pros), neurons with an antibody against Embryonic lethal abnormal visual  
248 system (Elav) and glial cells with an antibody against Reversed polarity (Repo) (Figure  
249 6A-D). Neuroepithelial cells were segmented based on a staining with an antibody  
250 against Disc large (Dlg) using TrakEM2 in Fiji (Figure 6E). Image stacks obtained from  
251 the immunostainings with these markers served to produce cell type-specific  
252 segmentation masks for the ratiometric analysis (Figure 6A' - E').

253 In general, and as expected from our brain-compartment analysis, each cell type in the  
254 central brain showed a lower hypoxic response as compared to the same cell type in  
255 the optic lobe (Figure 6F). Interestingly, however, we observed cell-type specific  
256 differences in the hypoxia response between cell types, regardless of the localisation of  
257 the cells in the brain. Neuroblasts (Dpn-positive cells) in the optic lobe showed the  
258 strongest hypoxia response, while ganglion mother cells (Pros-positive cells) in the  
259 central brain showed the weakest hypoxia response of all analysed cell types in the  
260 brain (mean ratio values for optic lobe neuroblasts: 1.51 and for central brain ganglion  
261 mother cells 0.75) (Figure 6A, B and G). In both the central brain and the optic lobes,  
262 Dpn-positive neuroblasts were on average more hypoxic than any other cell type in the  
263 corresponding brain compartment. Neurons (Elav-positive cells) and glial cells (Repo-  
264 positive cells) showed intermediate levels of hypoxia response in the corresponding

265 brain compartments (Figure 6C, D; mean ratio values for central brain neurons: 0.81,  
266 optic lobe neurons: 1.24 and central brain glial cells 0.92, optic lobe glial cells: 1.16,  
267 n=4).

268 We next measured the average minimum distance between cells of a defined cell type  
269 and neighbouring tracheole (Figure 6F). The average 1/Ratio values (oxygenation) for  
270 most cell types in the central brain and the optic lobe followed a decaying exponential  
271 function as described above. Of interest is that central brain and optic lobe neuroblasts  
272 showed a stronger and central brain ganglion mother cells a much weaker hypoxia  
273 response as compared to the prediction. Most unexpected based on the predicted map  
274 was the observation that neuroepithelial cells of the outer and inner proliferation centre  
275 (OPC and IPC) revealed virtually the same level of hypoxia response (Figure 6E, mean  
276 ratio values for OPC: 1.16 and IPC: 1.16, n=4). This is remarkable because IPC  
277 neuroepithelial cells are located much closer to the densely tracheolated central brain  
278 compartment than OPC neuroepithelial cells.

279

### 280 **Neuroepithelial cells are resilient to differential oxygen levels**

281 In order to investigate the idea that certain cell types are less efficient than others in  
282 sensing oxygen levels via the canonical hypoxia pathway we compared the hypoxia  
283 response in neuroepithelial cells and neuroblasts under ambient hyperoxia (Figure 6H).  
284 Interestingly, while neuroblasts in the central brain and in the optic lobe were able to  
285 greatly adapt their hypoxia response to different oxygen levels, neuroepithelial cells of  
286 the IPC and OPC changed their response to a much lower degree. This indicates that  
287 neuroepithelial cells might be less susceptible to changes in oxygen levels.

288 This finding prompted us to investigate a dataset with genome-wide information on  
289 larval brain gene expression (Southall et al., 2013). In this study, cell-type specific  
290 targeted DamID methods were used to compare Polymerase II occupancy between  
291 neuroepithelial cells and neuroblasts in the third instar larval brain at age 96 hrs ALH.  
292 In both progenitor cell types, glycolytic genes were significantly enriched, indicative of a  
293 lower oxygen availability to use oxygen for oxidative respiration for cellular energy  
294 production. Moreover, enrichment in hypoxia pathway genes was found in the  
295 neuroblast specific gene catalogue but not in neuroepithelial cell specific gene  
296 catalogue (Table 1). The results support the notion that in neuroepithelial cells the  
297 canonical hypoxia pathway might be less relevant in order to respond to differential  
298 oxygen levels.

299

300

301

## 302 DISCUSSION

303 Ambient oxygen has crucial roles for the development and the growth of organisms  
304 ([Harrison and Haddad, 2011](#)). Two recent studies demonstrate how *Drosophila* larvae  
305 can adapt to low atmospheric oxygen or hypoxia by reducing their growth rate through  
306 systemic mechanisms ([Lee et al., 2019](#); [Texada et al., 2019](#)). Less understood are the  
307 direct effects of differential oxygen supply within a tissue on cellular maintenance,  
308 proliferation and differentiation. Our knowledge is sparse on how different cell types  
309 within an organ or a tissue respond to various levels of oxygen provided by the  
310 vascular or the tracheal system, in mammals and insects, respectively.

311 Our study is based on the observation of significant differences in tracheolation  
312 between brain compartments in the developing *Drosophila* larvae. While the central  
313 brain is densely tracheolated, the optic lobes are only very sparsely tracheolated  
314 throughout larval life. This dichotomy in tracheolation correlates with cellular  
315 differentiation within the two compartments and indicates that keeping relatively low  
316 levels of oxygen might be important for optic lobe progenitor proliferation and  
317 maintenance. Indeed, hypoxia has an important function in the neural stem cell niche  
318 and for normal neural development. A tight spatial and temporal correlation between  
319 the degree of vascularization and the segregation of proliferative and differentiating  
320 zones of the brain were found in the developing mammalian cerebral cortex. Here, the  
321 proliferative zone is poorly vascularised and stem cells rely on glycolytic metabolism for  
322 energy production. With the arrival of the first blood vessels oxygen levels are elevated,  
323 which leads to HIF1- $\alpha$  degradation and neuronal differentiation. Blocking angiogenesis  
324 in the proliferative zones maintains the proliferative state of stem cells at the expense  
325 of differentiation. Conversely, induced increase in oxygen levels leads to premature  
326 neurogenesis ([Lange et al., 2016](#)).

327 We find a similar relationship between the hypoxia response and the differentiation  
328 state of different brain compartments in the *Drosophila* brain. A large part of the central  
329 brain comprises a fully differentiated nervous system, which controls larval behaviour.  
330 In the central brain there are only about one hundred neural stem cells or neuroblasts,  
331 which undergo self-renewing divisions to generate intermediate ganglion mother cells  
332 and secondary neurons for the adult nervous system. In contrast, in the optic lobes a  
333 pool of several hundreds of neuroepithelial cells arises through symmetric proliferative  
334 divisions. Neuroepithelial cells are then progressively transformed into optic lobe  
335 medulla neuroblasts at the end of larval development ([Egger et al., 2007](#); [Yasugi et al.,](#)  
336 [2010](#)), which generate GMCs and neurons for the adult visual system. These neurons  
337 remain in a state of arrested differentiation until the second half of pupal life, when a  
338 wave of massive synaptogenesis starts ([Melnattur and Lee, 2011](#); [Chen et al., 2014](#)).



339 This indicates the existence of a mechanism that arrests differentiation of neural  
340 progeny during larval life. Hypoxia could be part of such a mechanisms and future  
341 experiments should reveal whether ambient hyperoxia, or local hyperoxia caused by  
342 ectopic tracheolation of the optic lobe result in altered mitotic activity and premature  
343 synaptogenesis.

344 In correlation with the observed differences in tracheolation, we found that cells in the  
345 optic lobe show a stronger hypoxic response as compared to cells in the central brain.  
346 The hypoxia biosensor provides a remarkable spatial resolution and it is possible to  
347 detect a differential hypoxia response in cells that are in close proximity to each other.  
348 We combined the ratiometric analysis with cell type specific markers and found that  
349 central brain and optic lobe neuroblasts appear to be the most hypoxic cell types in the  
350 developing larval brain. It suggests as documented also by other studies that lower  
351 oxygen is a condition that favours more undifferentiated and multipotent cell types  
352 ([Eliasson et al., 2010](#); [Lange et al., 2016](#)). More committed neuronal progenitors such  
353 as ganglion mother cells and more differentiated cell types such as neurons and glial  
354 cells appeared to have a weaker hypoxia response. This suggests that a less hypoxic  
355 environment favours a more advanced state of cell differentiation. This is not the first  
356 time that such a model was suggested. Cipolleschi and colleagues proposed that the  
357 distance between a cell and a blood vessel in the stem cell hematopoietic niche could  
358 be an indicator of cell potency ([Cipolleschi et al., 1993](#)). A cell exposed to low levels of  
359 oxygen has higher multipotency and less fate commitment than a cell exposed to high  
360 oxygen. A similar relationship could be in place in the *Drosophila* larval optic lobe,  
361 where mitotic progenitor cells will be protected from oxidative damage by being  
362 segregated within a more hypoxic microenvironment, which becomes gradually more  
363 oxygenated as they advance in the differentiation process. In *Drosophila* a previous  
364 study by Homem and colleagues suggest that larval self-renewing neuroblasts initially  
365 use glycolytic pathways and only switch to oxidative phosphorylation at later pupal  
366 stages to initiate neuroblast shrinking and differentiation ([Homem et al., 2014](#)). Hence it  
367 would be interesting to investigate the relationship between neuroblast differentiation  
368 and tracheolation at pupal stages.

369 We provide evidence that oxygen levels as measured by the hypoxia biosensor  
370 decrease exponentially with the increase of the distance between a cell and its closest  
371 tracheole. While the great majority of cell types investigated here follow this model, we  
372 found some striking exceptions and most prominently the neuroepithelial cells of the  
373 inner proliferation centre. These cells are in close proximity of the densely tracheolated  
374 central brain but reveal an unexpectedly strong hypoxia response. Meanwhile, GMCs  
375 in the central brain show a much lower hypoxia response as compared to the predicted

376 values. This prompts the question to what degree cell type and cell intrinsic  
377 mechanisms are responsible for a differential hypoxia response. Our study leads to the  
378 interpretation that the oxygen-dependent degradation of HIF-1 $\alpha$  within a given cell  
379 depends mostly on its distance to tracheoles, but to a certain degree also on cell-type  
380 specific features. Among several possible explanations, we regard as probable the  
381 existence of cell-type specific differences in transcriptomes, metabolisms and the  
382 general capacity of given cell types to degrade the GFP-ODD of the biosensor.

383 We found that while neuroblasts adapt their hypoxia response to elevated ambient  
384 oxygen levels (hyperoxia), optic lobe neuroepithelial cells seem to have a more limited  
385 capacity to respond. This might be due to differential gene expression of hypoxia  
386 pathway genes in these two cell types. Indeed, by re-analysing cell type specific  
387 Polymerase II DamID data (Southall et al., 2013) we found that the transcriptome of  
388 neuroblasts, but not that of neuroepithelial cells, is highly enriched in hypoxia response  
389 genes.

390 Normally hypoxia triggers an adaptive response, which among other things upregulates  
391 glycolysis and angiogenesis (in mammals) or tracheolation (in insects). In *Drosophila*,  
392 this can be driven through different pathways, of which at least one is HIF-1 $\alpha$   
393 dependent (Li et al., 2013). In *Drosophila* larvae, hypoxia induces an increase in the  
394 length and branching of tracheoles in a matter of hours (Jarecki et al., 1999; Centanin  
395 et al., 2008). Here we reported that this does not happen in the optic lobe even after  
396 several days of larval life. On the contrary, our measurements indicate that the  
397 proportion of optic lobe deprived of tracheoles increases with age, suggesting the  
398 existence of a mechanism that mediates adaptation through enhanced glycolysis but  
399 without compensatory growth of tracheoles. The finding of the neuroepithelial gene  
400 catalogue not being enriched in genes of the cellular response to hypoxia appears to  
401 support this possibility and is, in turn, consistent with our hypothesis that the lack of  
402 tracheolation in the optic lobe is an adaptation to keep neural stem cells in a hypoxic  
403 compartment and as such an important feature of normal brain development. Hypoxia  
404 in the larval optic lobe will, in turn, promote proliferation and inhibit terminal  
405 differentiation of neurons.

406

407

## 408 **MATERIALS AND METHODS**

### 409 **Fly stocks**

410 Flies were raised on cornmeal medium at 25°C under light-dark cycles of 12:12 hrs  
411 light:darkness. Oregon R was used as wild type. The oxygen biosensor line used in this



412 study contains the transgenes *ubi-GFP-ODD* (Misra et al., 2017) and *ubi-mRFPnls* (BL-  
413 34500), both inserted on the second chromosome.

414

#### 415 **Larval staging, dissections and immunostainings**

416 Eggs were collected during a two hours period on apple juice agar plates. After 24 hrs  
417 freshly hatched larvae were transferred to standard cornmeal medium and placed in an  
418 incubator at 25°C with a 12:12 hrs light:dark cycle. Larval brains were dissected in 4%  
419 paraformaldehyde in 0.1M phosphate-buffered saline (PBS, pH 7.4), 0.5 mM EGTA, 5  
420 mM MgCl and fixed for 18 minutes (including the time of dissection), washed with PBS  
421 containing 0.1% Triton X-100 3 times for 5 min and 4 times for 15 min. For  
422 immunofluorescent stainings, whole larval brains were incubated in primary antibodies  
423 overnight at 4°C. Incubations with secondary antibodies were also performed overnight  
424 at 4°C. Samples were washed at room temperature and mounted in Vectashield H-100  
425 (Vector Laboratories). The following primary antibodies were used for specific protein  
426 labelling: mouse anti-Bruchpilot 1:50 (Nc82, DSHB; (Hofbauer et al., 2009)); mouse  
427 monoclonal anti-Discs large 1:30 (4F3, DSHB); guinea pig polyclonal anti-Deadpan  
428 1:1000 (gift from A. Brand, Cambridge UK), mouse monoclonal anti-Prospero 1:10  
429 (MR1A, DSHB; (Campbell et al., 1994)), rat polyclonal anti-Elav 1:20 (7E8A10, DSHB;  
430 (O'Neill et al., 1994)), and mouse monoclonal anti-Repo 1:10 (MAb 8D12, DSHB  
431 deposited by Goodman, (Alfonso and Jones, 2002)). The chitinous cuticle lining of the  
432 tracheal lumen was visualized either by its own autofluorescence under UV illumination  
433 or after staining with the fluorescent chitin-marker Calcofluor (1:200; Sigma).  
434 Appropriate secondary antibodies conjugated to Alexa fluorochromes were used: Alexa  
435 405, Alexa 488, Alexa 568 and Alexa 633 all 1:200 (Molecular Probes).

436

#### 437 **Hyperoxia and hypoxia treatments**

438 Embryos were collected for two hours at 25°C on apple juice-agar plates and  
439 transferred to plates with standard food medium. For hyperoxia treatment, at 24 hrs  
440 after larval hatching (ALH) larvae were placed in a Modular Incubator Chamber (MIC-  
441 101; Billups-Rothenberg, Inc.), which was flushed with pre-mixtures of 60% oxygen in  
442 nitrogen (PanGas AG). At 84 hrs ALH, towards the end of the wandering stage, the  
443 larvae were dissected as described above. Oxygen concentration inside the chamber  
444 was monitored with an oxygen analyzer/monitor (Vascular Technology VTI-122  
445 Disposable Polarography Oxygen Cell Catalog No. 100122). For the hypoxia treatment,  
446 larvae were collected at 60 hrs ALH and placed in the incubation chamber previously  
447 flushed with 5% oxygen pre-mixture in nitrogen for 24 hrs. Larvae under hypoxia tend  
448 to escape the medium, refrain from feeding and become delayed in development

449 (Callier et al., 2013; Wong et al., 2014; Bailey et al., 2015). For this reason, we decided  
450 to use a shorter hypoxia treatment that was still long enough to observe a change in  
451 brain oxygenation with the biosensor.

452

### 453 **Light microscopy, image processing and analysis**

454 For each brain, a single hemisphere was imaged using a 60x objective on a TCS Leica  
455 SPE-II laser scanning confocal microscope or with a 60x objective on an Olympus  
456 Fluoview FV300. Optical sections across the entire brain hemisphere were recorded at  
457 0.6  $\mu\text{m}$  intervals for tracheal surface measurement, at 1  $\mu\text{m}$  intervals for the temporal  
458 ratiometric analysis with the hypoxia biosensor and at 2  $\mu\text{m}$  for cell type specific  
459 ratiometric analysis with the hypoxia biosensor. The ratiometric analysis was performed  
460 with Fiji as described in (Misra et al., 2017). The macro and plugin can be found on  
461 Github: <https://github.com/eggerbo>.

462 Measurements of tracheolar length (Figure 2) were done separately in the optic lobe  
463 and in the central brain with Simple Neurite Tracer (Longair et al., 2011). TrakEM2 in  
464 Fiji (Schindelin et al., 2012) was used to segment the two volumes to be compared  
465 (optic lobe and central brain) following the neuroanatomical borders outlined by anti-  
466 Dlg staining. Reconstructions and quantifications were done in Fiji. Figures and  
467 illustrations were assembled using Adobe Photoshop 8.0, Adobe Illustrator 11.0 and  
468 Inkscape 0.92.

469

### 470 **3D trachea map annotation and proximity analysis to brain cells**

471 A pixel-resolution map of the tracheal system in the whole brain hemisphere was  
472 produced. To obtain this map, a stack of images containing the tracheal system were  
473 processed by background subtraction and smoothing. Then, a threshold was applied  
474 and the x,y,z coordinates of every pixel corresponding to every tracheole was stored to  
475 produce a digital map. Our ratiometric analysis provides ratiometric values for every  
476 nucleus in the brain hemisphere together with their x,y,z coordinates. Combining both  
477 data sets we calculated the Euclidean minimal distance from every nucleus in the brain  
478 hemisphere to the tracheal system. The analysis was performed in Python.

479

### 480 **Prediction of Ratio values based on tracheole proximity**

481 The relationship between 1/Ratio values and proximity to tracheoles was best modelled  
482 by a decaying exponential function of the form:

483

$$484 \quad y = y_0 + A \cdot e^{\left(\frac{x-x_0}{\lambda}\right)}$$

485 where  $\lambda$  is the length constant.  $\lambda$ ,  $y_0$  and  $A$  are fitting parameters and  $x_0$  is a constant.  
486 We used the exponential function resulting from the best fit to the data to predict the  
487 value of hypoxia response according to tracheole distance. We used Fiji to represent  
488 these values for every nucleus in the brain with a colour scale (Figure 4 shows a single  
489 section of the resulting stack image map). Fits were performed and analyzed with Igor  
490 Pro (Wavemetrics).

491

#### 492 **Cell type specific analysis**

493 To analyse the hypoxia biosensor in a cell type-specific manner ratiometric values were  
494 measured only for a specific cell type at a time. For this, a segmentation mask was  
495 generated for each major cell type in the brain using the fluorescent intensity signal  
496 corresponding to each cell type: Glia were identified by expression of Repo (mouse  
497 monoclonal anti-Repo); neuroblasts by the expression of Deadpan (guinea pig  
498 polyclonal anti-Dpn), ganglion mother cells by the expression of Pros (mouse  
499 monoclonal anti-Pros); and neurons by the expression of Elav (rat polyclonal anti-Elav).  
500 The inner proliferation center (IPC) and outer proliferation center (OPC) were  
501 segmented using the TrakEM2 software in Fiji following neuroanatomical borders  
502 outlined by anti-Dlg staining.

503

#### 504 **Transmission electron microscopy**

505 Brain samples for transmission electron microscopy were prepared from five wild-type  
506 (Oregon R) 96 hrs ALH larvae, according to the protocol detailed in ([Talamillo et al., 2008](#)).  
507 The brain was oriented and trimmed to obtain slightly tilted frontal views of one  
508 hemisphere. Ultrathin (50-60nm) sections were observed with a JEOL JEM 1010  
509 electron microscope operated at 80kV. Several grids of each brain, each containing  
510 several sections, were observed. Images were taken with a Hamamatsu C4742-95  
511 camera and processed with AMT Advantage and Adobe Photoshop.

512

#### 513 **Statistical analysis**

514 All data analyses and graphs were done using R/Bioconductor. Scripts for graphs can  
515 be found here: <https://github.com/MartinBaccinoCalace>. Biological replicates (n) are  
516 single brain lobes of different animals. For the optic lobe and central brain ratio values  
517 boxplot charts were created in such a way that each boxplot contained the normalized  
518 frequency values for seven replicates in a given bin. Student t-tests were performed  
519 when assumptions for parametric test were accomplished (normality using Shapiro-  
520 Wilk test and homoscedasticity using Levene's test). If these assumptions were not  
521 achieved, nonparametric Mann-Whitney U tests were performed instead. Statistical

522 significance was set at 0.05, 0.01 and 0.001. For tracheolation analysis Mann-Whitney  
523 U tests were performed and statistical significance was set at 0.05. Power analysis was  
524 conducted in RStudio to estimate minimum sample size for a power of 0.8 and  $\alpha$  level  
525 of 0.05 for a two-sided student t test or Mann-Whitney U test.

526

### 527 **Gene enrichment analysis**

528 A previous published dataset ([Southall et al., 2013](#)) was re-analysed to investigate  
529 hypotheses postulated in this paper. It contains cell-type specific gene expression  
530 catalogues of neural stem cells at third larval instar, obtained with an assay of RNA  
531 Polymerase II occupancy in either neuroepithelial cells or neuroblasts. The catalogues  
532 of genes expressed in either neuroepithelium or neuroblasts were curated to correct for  
533 gene annotation changes in the current version of the genome and the resulting  
534 catalogues were used to calculate whether they were enriched for the Gene Ontology  
535 terms in biological functions “cellular response to hypoxia” (GO:00771456) or  
536 “glycolytic process” (GO:0006096). To test for significance the hypergeometric test was  
537 used.

538

### 539 **ACKNOWLEDGEMENTS**

540 We thank A. Brand, the Developmental Studies Hybridoma Bank and the Bloomington  
541 Stock Center for reagents and fly lines. We thank F. Meyenhofer for support on the  
542 image analysis pipeline and H. Akarsu for assistance with the R scripts. Special thanks  
543 go to S. Luschnig for the biosensor line and for valuable comments on the manuscript.  
544 We also thank the Sprecher laboratory for insightful discussions. M.B-C. was supported  
545 by Agencia Nacional de Investigación e Innovación, grant FCE\_3\_2013\_1\_100732.  
546 R.C. and M.B-C. were supported by Uruguay’s Programa de Desarrollo de las Ciencias  
547 Básicas. R.C. and DP received support from Uruguay’s Sistema Nacional de  
548 Investigadores. B.E. was supported by the Swiss University Conference (P-01 BIO  
549 BEFRI).

550

### 551 **AUTHOR CONTRIBUTIONS**

552 M.B-C. Writing original draft, Investigation, Formal analysis, Visualization.

553 D.P. Writing-review and editing, Investigation, Formal analysis, Visualization.

554 R.C. Conceptualization, Writing-review and editing, Investigation, Formal analysis,  
555 Supervision, Funding Acquisition.

556 B.E. Conceptualization, Writing-review and editing, Investigation, Data curation,  
557 Supervision, Project Administration, Funding Acquisition.

558 **REFERENCES**

- 559 Alfonso TB, Jones BW. 2002. *gcm2* promotes glial cell differentiation and is required  
560 with glial cells missing for macrophage development in *Drosophila*.  
561 *Developmental Biology* **248**: 369-83.
- 562 Bailey AP, Koster G, Guillermier C, Hirst EM, MacRae JI, Lechene CP, Postle AD,  
563 Gould AP. 2015. Antioxidant role for lipid droplets in a stem cell niche of  
564 *Drosophila*. *Cell* **163**: 340-53. doi:10.1016/j.cell.2015.09.020
- 565 Bee D, Pallot DJ, Barer GR. 1986. Division of type I and endothelial cells in the hypoxic  
566 rat carotid body. *Acta Anatomica* **126**: 226-9. doi:10.1159/000146222
- 567 Bownes M. 1982. Ovarian yolk-protein synthesis in *Drosophila melanogaster*. *Journal*  
568 *of Insect Physiology* **28**: 953-60.
- 569 Callier V, Shingleton AW, Brent CS, Ghosh SM, Kim J, Harrison JF. 2013. The role of  
570 reduced oxygen in the developmental physiology of growth and metamorphosis  
571 initiation in *Drosophila melanogaster*. *Journal of Experimental Biology* **216**:  
572 4334-40. doi:10.1242/jeb.093120
- 573 Campbell G, Goring H, Lin T, Spana E, Andersson S, Doe CQ, Tomlinson A. 1994.  
574 RK2, a glial-specific homeodomain protein required for embryonic nerve cord  
575 condensation and viability in *Drosophila*. *Development* **120**: 2957-66.
- 576 Carnero A, Leonart M. 2016. The hypoxic microenvironment: A determinant of cancer  
577 stem cell evolution. *Bioessays* **38 Suppl 1**: S65-74.  
578 doi:10.1002/bies.201670911
- 579 Centanin L, Dekanty A, Romero N, Irisarri M, Gorr TA, Wappner P. 2008. Cell  
580 autonomy of HIF effects in *Drosophila*: tracheal cells sense hypoxia and induce  
581 terminal branch sprouting. *Developmental Cell* **14**: 547-58.  
582 doi:10.1016/j.devcel.2008.01.020
- 583 Chen Y, Akin O, Nern A, Tsui CY, Pecot MY, Zipursky SL. 2014. Cell-type-specific  
584 labeling of synapses in vivo through synaptic tagging with recombination.  
585 *Neuron* **81**: 280-93. doi:10.1016/j.neuron.2013.12.021
- 586 Cipolleschi MG, Dello Sbarba P, Olivotto M. 1993. The role of hypoxia in the  
587 maintenance of hematopoietic stem cells. *Blood* **82**: 2031-7.
- 588 Csete M. 2005. Oxygen in the cultivation of stem cells. *Annals of the New York*  
589 *Academy of Sciences* **1049**: 1-8. doi:10.1196/annals.1334.001
- 590 Egger B, Boone JQ, Stevens NR, Brand AH, Doe CQ. 2007. Regulation of spindle  
591 orientation and neural stem cell fate in the *Drosophila* optic lobe. *Neural*  
592 *Development* **2**: 1.
- 593 Eliasson P, Rehn M, Hammar P, Larsson P, Sirenko O, Flippin LA, Cammenga J,  
594 Jonsson JI. 2010. Hypoxia mediates low cell-cycle activity and increases the  
595 proportion of long-term-reconstituting hematopoietic stem cells during in vitro  
596 culture. *Experimental Hematology* **38**: 301-10 e2.  
597 doi:10.1016/j.exphem.2010.01.005
- 598 Ezashi T, Das P, Roberts RM. 2005. Low O<sub>2</sub> tensions and the prevention of  
599 differentiation of hES cells. *Proceedings of the National Academy of Sciences*  
600 *of the United States of America* **102**: 4783-8. doi:10.1073/pnas.0501283102
- 601 Fischbach KF, Hiesinger PR. 2008. Optic lobe development. *Advances in Experimental*  
602 *Medicine and Biology* **628**: 115-36.
- 603 Green P, Hartenstein AY, Hartenstein V. 1993. The embryonic development of the  
604 *Drosophila* visual system. *Cell and Tissue Research* **273**: 583-98.
- 605 Gustafsson MV, Zheng X, Pereira T, Gradin K, Jin S, Lundkvist J, Ruas JL, Poellinger  
606 L, Lendahl U, Bondesson M. 2005. Hypoxia requires notch signaling to maintain  
607 the undifferentiated cell state. *Developmental Cell* **9**: 617-28.
- 608 Harrison JF, Haddad GG. 2011. Effects of oxygen on growth and size: synthesis of  
609 molecular, organismal, and evolutionary studies with *Drosophila melanogaster*.  
610 *Annual Review of Physiology* **73**: 95-113. doi:10.1146/annurev-physiol-012110-  
611 142155



- 612 Hartenstein V, Spindler S, Peraanu W, Fung S. 2008. The development of the  
613 *Drosophila* larval brain. *Advances in Experimental Medicine and Biology* **628**: 1-  
614 31. doi:10.1007/978-0-387-78261-4\_1
- 615 Hasegawa E, Kitada Y, Kaido M, Takayama R, Awasaki T, Tabata T, Sato M. 2011.  
616 Concentric zones, cell migration and neuronal circuits in the *Drosophila* visual  
617 center. *Development* **138**: 983-93. doi:10.1242/dev.058370
- 618 Hofbauer A, Campos-Ortega JA. 1990. Proliferation pattern and early differentiation of  
619 the optic lobes in *Drosophila melanogaster*. *Roux's Arch Dev Biol* **198**: 264-74.
- 620 Hofbauer A, Ebel T, Waltenspiel B, Oswald P, Chen YC, Halder P, Biskup S,  
621 Lewandrowski U, Winkler C, Sickmann A et al. 2009. The Wuerzburg  
622 hybridoma library against *Drosophila* brain. *Journal of Neurogenetics* **23**: 78-91.  
623 doi:10.1080/01677060802471627
- 624 Homem CCF, Steinmann V, Burkard TR, Jais A, Esterbauer H, Knoblich JA. 2014.  
625 Ecdysone and mediator change energy metabolism to terminate proliferation in  
626 *Drosophila* neural stem cells. *Cell* **158**: 874-88. doi:10.1016/j.cell.2014.06.024
- 627 Iyengar BG, Chou CJ, Sharma A, Atwood HL. 2006. Modular neuropile organization in  
628 the *Drosophila* larval brain facilitates identification and mapping of central  
629 neurons. *Journal of Comparative Neurology* **499**: 583-602.  
630 doi:10.1002/cne.21133
- 631 Jarecki J, Johnson E, Krasnow MA. 1999. Oxygen regulation of airway branching in  
632 *Drosophila* is mediated by *branchless* FGF. *Cell* **99**: 211-20. doi:10.1016/s0092-  
633 8674(00)81652-9
- 634 Jones DL, Wagers AJ. 2008. No place like home: anatomy and function of the stem cell  
635 niche. *Nature reviews. Molecular cell biology* **9**: 11-21. doi:10.1038/nrm2319
- 636 Kittel RJ, Wichmann C, Rasse TM, Fouquet W, Schmidt M, Schmid A, Wagh DA,  
637 Pawlu C, Kellner RR, Willig KI et al. 2006. Bruchpilot promotes active zone  
638 assembly, Ca<sup>2+</sup> channel clustering, and vesicle release. *Science* **312**: 1051-4.  
639 doi:10.1126/science.1126308
- 640 Lange C, Turrero Garcia M, Decimo I, Bifari F, Eelen G, Quaegebeur A, Boon R, Zhao  
641 H, Boeckx B, Chang J et al. 2016. Relief of hypoxia by angiogenesis promotes  
642 neural stem cell differentiation by targeting glycolysis. *EMBO Journal* **35**: 924-  
643 41. doi:10.15252/embj.201592372
- 644 Lee B, Barretto EC, Grewal SS. 2019. TORC1 modulation in adipose tissue is required  
645 for organismal adaptation to hypoxia in *Drosophila*. *Nat Commun* **10**: 1878.  
646 doi:10.1038/s41467-019-09643-7
- 647 Lee KE, Simon MC. 2012. From stem cells to cancer stem cells: HIF takes the stage.  
648 *Current Opinion in Cell Biology* **24**: 232-5. doi:10.1016/j.ceb.2012.01.005
- 649 Li L, Xie T. 2005. Stem cell niche: structure and function. *Annual Review of Cell and*  
650 *Developmental Biology* **21**: 605-31.  
651 doi:10.1146/annurev.cellbio.21.012704.131525
- 652 Li Z, Zhang Y, Han L, Shi L, Lin X. 2013. Trachea-derived dpp controls adult midgut  
653 homeostasis in *Drosophila*. *Developmental Cell* **24**: 133-43.  
654 doi:10.1016/j.devcel.2012.12.010
- 655 Longair MH, Baker DA, Armstrong JD. 2011. Simple Neurite Tracer: open source  
656 software for reconstruction, visualization and analysis of neuronal processes.  
657 *Bioinformatics* **27**: 2453-4. doi:10.1093/bioinformatics/btr390
- 658 Meinertzhagen I, Hanson T. 1993. The development of the optic lobe. In *The*  
659 *development of Drosophila melanogaster*,. Edited by: Bate M, Martiney-Arias A.  
660 Cold Spring Harbor, New York; Cold Spring Harbor Press;: 1363-491.
- 661 Melnattur KV, Lee CH. 2011. Visual circuit assembly in *Drosophila*. *Developmental*  
662 *neurobiology* **71**: 1286-96. doi:10.1002/dneu.20894
- 663 Misra T, Baccino-Calace M, Meyenhofer F, Rodriguez-Crespo D, Akarsu H, Armenta-  
664 Calderon R, Gorr TA, Frei C, Cantera R, Egger B et al. 2017. A genetically  
665 encoded biosensor for visualising hypoxia responses in vivo. *Biol Open* **6**: 296-  
666 304. doi:10.1242/bio.018226

- 667 Mohyeldin A, Garzon-Muvdi T, Quinones-Hinojosa A. 2010. Oxygen in stem cell  
668 biology: a critical component of the stem cell niche. *Cell stem cell* **7**: 150-61.  
669 doi:10.1016/j.stem.2010.07.007
- 670 Morrison SJ, Spradling AC. 2008. Stem cells and niches: mechanisms that promote  
671 stem cell maintenance throughout life. *Cell* **132**: 598-611.  
672 doi:10.1016/j.cell.2008.01.038
- 673 Nurse CA, Vollmer C. 1997. Role of basic FGF and oxygen in control of proliferation,  
674 survival, and neuronal differentiation in carotid body chromaffin cells.  
675 *Developmental Biology* **184**: 197-206. doi:10.1006/dbio.1997.8539
- 676 O'Neill EM, Rebay I, Tjian R, Rubin GM. 1994. The activities of two Ets-related  
677 transcription factors required for *Drosophila* eye development are modulated by  
678 the Ras/MAPK pathway. *Cell* **78**: 137-47.
- 679 Panchision DM. 2009. The role of oxygen in regulating neural stem cells in  
680 development and disease. *Journal of Cellular Physiology* **220**: 562-8.  
681 doi:10.1002/jcp.21812
- 682 Pardal R, Ortega-Saenz P, Duran R, Lopez-Barneo J. 2007. Glia-like stem cells sustain  
683 physiologic neurogenesis in the adult mammalian carotid body. *Cell* **131**: 364-  
684 77. doi:10.1016/j.cell.2007.07.043
- 685 Pereanu W, Spindler S, Cruz L, Hartenstein V. 2007. Tracheal development in the  
686 *Drosophila* brain is constrained by glial cells. *Developmental Biology* **302**: 169-  
687 80. doi:10.1016/j.ydbio.2006.09.022
- 688 Peterson SJ, Krasnow MA. 2015. Subcellular trafficking of FGF controls tracheal  
689 invasion of *Drosophila* flight muscle. *Cell* **160**: 313-23.  
690 doi:10.1016/j.cell.2014.11.043
- 691 Scadden DT. 2006. The stem-cell niche as an entity of action. *Nature* **441**: 1075-9.  
692 doi:10.1038/nature04957
- 693 Schindelin J, Arganda-Carreras I, Frise E, Kaynig V, Longair M, Pietzsch T, Preibisch  
694 S, Rueden C, Saalfeld S, Schmid B et al. 2012. Fiji: an open-source platform for  
695 biological-image analysis. *Nature methods* **9**: 676-82. doi:10.1038/nmeth.2019
- 696 Schofield R. 1978. The relationship between the spleen colony-forming cell and the  
697 haemopoietic stem cell. *Blood Cells* **4**: 7-25.
- 698 Simon MC, Keith B. 2008. The role of oxygen availability in embryonic development  
699 and stem cell function. *Nature reviews. Molecular cell biology* **9**: 285-96.  
700 doi:10.1038/nrm2354
- 701 Simsek T, Kocabas F, Zheng J, Deberardinis RJ, Mahmoud AI, Olson EN, Schneider  
702 JW, Zhang CC, Sadek HA. 2010. The distinct metabolic profile of hematopoietic  
703 stem cells reflects their location in a hypoxic niche. *Cell stem cell* **7**: 380-90.  
704 doi:10.1016/j.stem.2010.07.011
- 705 Southall TD, Gold KS, Egger B, Davidson CM, Caygill EE, Marshall OJ, Brand AH.  
706 2013. Cell-type-specific profiling of gene expression and chromatin binding  
707 without cell isolation: assaying RNA Pol II occupancy in neural stem cells.  
708 *Developmental Cell* **26**: 101-12. doi:10.1016/j.devcel.2013.05.020
- 709 Storch A, Paul G, Csete M, Boehm BO, Carvey PM, Kupsch A, Schwarz J. 2001. Long-  
710 term proliferation and dopaminergic differentiation of human mesencephalic  
711 neural precursor cells. *Experimental Neurology* **170**: 317-25.  
712 doi:10.1006/exnr.2001.7706
- 713 Studer L, Csete M, Lee SH, Kabbani N, Walikonis J, Wold B, McKay R. 2000.  
714 Enhanced proliferation, survival, and dopaminergic differentiation of CNS  
715 precursors in lowered oxygen. *Journal of Neuroscience* **20**: 7377-83.
- 716 Takubo K, Goda N, Yamada W, Iriuchishima H, Ikeda E, Kubota Y, Shima H, Johnson  
717 RS, Hirao A, Suematsu M et al. 2010. Regulation of the HIF-1alpha level is  
718 essential for hematopoietic stem cells. *Cell stem cell* **7**: 391-402.  
719 doi:10.1016/j.stem.2010.06.020
- 720 Texada MJ, Jorgensen AF, Christensen CF, Koyama T, Malita A, Smith DK, Marple  
721 DFM, Danielsen ET, Petersen SK, Hansen JL et al. 2019. A fat-tissue sensor

- 722 couples growth to oxygen availability by remotely controlling insulin secretion.  
723 *Nat Commun* **10**: 1955. doi:10.1038/s41467-019-09943-y
- 724 Truman JW, Bate M. 1988. Spatial and temporal patterns of neurogenesis in the  
725 central nervous system of *Drosophila melanogaster*. *Developmental Biology*  
726 **125**: 145-57.
- 727 Wagh DA, Rasse TM, Asan E, Hofbauer A, Schwenkert I, Durrbeck H, Buchner S,  
728 Dabauvalle MC, Schmidt M, Qin G et al. 2006. Bruchpilot, a protein with  
729 homology to ELKS/CAST, is required for structural integrity and function of  
730 synaptic active zones in *Drosophila*. *Neuron* **49**: 833-44.  
731 doi:10.1016/j.neuron.2006.02.008
- 732 White K, Kankel DR. 1978. Patterns of cell division and cell movement in the formation  
733 of the imaginal nervous system in *Drosophila melanogaster*. *Developmental*  
734 *Biology* **65**: 296-321.
- 735 Wong DM, Shen Z, Owyang KE, Martinez-Agosto JA. 2014. Insulin- and warts-  
736 dependent regulation of tracheal plasticity modulates systemic larval growth  
737 during hypoxia in *Drosophila melanogaster*. *PLoS One* **9**: e115297.  
738 doi:10.1371/journal.pone.0115297
- 739 Yasugi T, Sugie A, Umetsu D, Tabata T. 2010. Coordinated sequential action of EGFR  
740 and Notch signaling pathways regulates proneural wave progression in the  
741 *Drosophila* optic lobe. *Development* **137**: 3193-203.
- 742



743 **FIGURE LEGENDS**

744

745 **Figure 1.** Tracheoles and undifferentiated cells are spatially segregated within the  
746 larval brain. Tracheoles (here imaged by means of their autofluorescence) are  
747 abundant within the central brain (A, left part of the hemisphere) as well as Bruchpilot-  
748 positive synapses (B), but sparse in the optic lobe (right part of the hemisphere, see  
749 also C) (n=6). The larval optic lobe is enriched in immature cells whilst most terminally-  
750 differentiated neurons are found in the central brain. At some planes a boundary can be  
751 observed between neurons and progenitors (C, dashed square). Transmission electron  
752 microscopy of a region similar to that squared in C reveals the boundary (arrowheads  
753 in D) between central brain differentiated neurons with a low nucleus/cytoplasm ratio  
754 (left in D, pseudo-coloured in magenta) and undifferentiated progenitors from the optic  
755 lobe, with much less cytoplasm (right in D, pseudo-coloured in yellow) (n=5). Neurons  
756 show big cell bodies enriched in organelles like mitochondria (E, pseudo-coloured in  
757 orange), rough endoplasmic reticulum cisternae (pseudo-coloured in light green), and  
758 Golgi cisternae (pseudo-coloured in cyan) and other organelles. Progenitor cells from  
759 the optic lobe (F) are less differentiated than primary central brain neurons and show a  
760 thin ring of cytoplasm around the nucleus. CB: central brain; OL: optic lobe; Nu:  
761 nucleus; Cy: cytoplasm; sNB: secondary neuroblasts; pNr: primary neurons; GMC:  
762 ganglion mother cells; sNr: secondary neurons; NE: neuroepithelium; NB: neuroblasts;  
763 uNr: undifferentiated neurons. Scale bar B-C: 50  $\mu$ m; D: 5  $\mu$ m; E-F: 500 nm.

764

765 **Figure 2.** The volume and the length of tracheoles of the optic lobe increase during  
766 larval development. Tracheal trees reconstructed from calcofluor white staining of 24-  
767 84h ALH larval brains at 12h intervals (A-F). The hemisphere and optic lobe are  
768 outlined with dashed lines. Optic lobe volume measurement from 24-96h ALH larval  
769 brains at 12h intervals show continuous growth (G), as well as total tracheolar length  
770 within the optic lobe (H). Analysis of the ratio of tracheal length and optic lobe volume  
771 show that growth in optic lobe volume is not compensated by normal increase of  
772 tracheal length (I). Scale bars are 20  $\mu$ m for panels A-C, 50  $\mu$ m for panels D-F. \*  
773 p<0.05, \*\* p<0.001, Mann-Whitney Wilcoxon test. ns.: non-significant; ALH: after larval  
774 hatching. Sample sizes for time points from 12hrs to 96hrs ALH n = 4, 6, 6, 6, 6, 5, 6.

775

776 **Figure 3.** Hypoxia response is differentially regulated between central brain and optic  
777 lobe throughout larval development. (A, C, E) ratiometric images of single frontal  
778 confocal section of a brain hemisphere of a larva expressing green (ubi-GFP-ODD) and  
779 red (ubi-mRFP-nls) fluorescent proteins of the biosensor. The colour code (upper right)

780 indicates average GFP-ODD/mRFP-nls ratios for each nucleus, which were segmented  
781 based on the mRFP-nls signal. (A', C', E') maximum intensity projection of the brain  
782 tracheal system (white). The dotted line denotes the separation between central brain  
783 and optic lobe. (B, D, F) histograms representing the frequency distribution of GFP-  
784 ODD/mRFP-nls ratios (normalised to whole brain average) for the central brain and the  
785 optic lobe, showing a clear difference in the distribution of values between the two  
786 compartments. (B', D', F') box plots showing the non-normalised mean GFP-  
787 ODD/mRFP-nls ratios. Box plots in (B', D', F') show maximum and minimum  
788 observation, upper and lower quartile, and median. Scale bars are: 15  $\mu\text{m}$  (A, A'), 20  
789  $\mu\text{m}$  (C, C'), 40  $\mu\text{m}$  (E, E'). \*  $p < 0.05$ , \*\*  $p < 0.01$ , \*\*\*  $p < 0.001$  student t-test or Mann-  
790 Whitney Wilcoxon test. Sample size  $n = 6, 6, 8$ .

791

792 **Figure 4.** Hypoxia response correlates with distance between a cell and closest next  
793 tracheole. (A) ratiometric image of an larval hemisphere 84 hrs ALH superimposed with  
794 a maximum projection of the tracheal system (white). (A') magnified view of yellow  
795 square in (A) which points to nuclei from the optic lobe volume surrounding the optic  
796 lobe lateral tracheole (OLTI, white arrow in (A)). Inset shows a single nucleus (inside  
797 dotted circle) for which the corresponding ratio value and distance to tracheole are  
798 shown (bottom right). (B) 1/Ratio plotted against distance to OLTI tracheole. Black line  
799 shows exponential fit to the data ( $n=6$ ). (C) 1/Ratio plotted against minimum distance to  
800 tracheole for every nucleus in the brain (purple: central brain, orange: optic lobe;  $n=6$ ).  
801 Black line is an exponential fit to the data. (D) exponential fits (red lines) for values of 8  
802 different brains; black dotted line shows average fit for these brains. (D) the function  
803 resulting of the exponential fit to the data was used to calculate a predicted ratio value  
804 if such value was solely based on the distance of a given nuclei to the closest  
805 tracheole. Scale bar: 40  $\mu\text{m}$ . These values were depicted with a colour code in (E).

806

807 **Figure 5.** GFP-ODD degradation is driven by oxygen availability. Ratiometric images  
808 for larva exposed to hyperoxia (A,  $n=7$ ) and hyperoxia (D,  $n=7$ ) and their corresponding  
809 maximum projection of their tracheal system (A', D'). Larva reared in ambient hyperoxia  
810 show a left-shift (higher oxygen) in the distribution of optic lobe ratio values (B). Brains  
811 of larva exposed to hyperoxia show lower ratio values both for central brain and optic  
812 lobe (B'). Larva reared in hypoxia show two distinct populations of values for central  
813 brain and optic lobe (E) as observed in normoxia (see Figure 3E). (E') non-normalized  
814 mean ratio values are increased (lower oxygen) as compared to normoxia. (C, F)  
815 1/Ratio (oxygenation) plotted against minimum distance to trachea. Sky blue lines (C)  
816 and orange lines (F) show exponential fits for different brains from larva reared in

817 hyperoxia and hypoxia, respectively. Dotted lines show average of all fits for normoxia  
818 (black), hyperoxia (dark blue) and hypoxia (red). Scale bars are 40  $\mu\text{m}$ . \*  $p < 0.05$ , \*\*  
819  $p < 0.01$ , \*\*\*  $p < 0.001$  student t-test or Mann-Whitney Wilcoxon test.

820

821 **Figure 6.** The biosensor reveals cell-type specific hypoxia states in central brain and  
822 optic lobe. (A to E) immunostainings for cell-type specific markers (gray): (A) anti-  
823 Deadpan (Neuroblasts, Nb), (B) anti-Prospero (Ganglion mother cells, GMC), (C) anti-  
824 Elav (neurons), (D) anti-Repo (glial cells) and (E) anti-Disc large (used to segment  
825 neuroepithelial cells). The morphology of neuroepithelial cells (IPC and OPC) allowed  
826 us to manually segment these cell populations using TrakEM2 based on the Disc large  
827 signal. The images from (A to D) were utilized as segmentation signals to create a  
828 mask for cell-type specific ratiometric analysis (A' to E'). (F) mean 1/Ratio  
829 (oxygenation) for central brain and optic lobe for each cell type is represented as a  
830 function of distance to trachea. The dotted line shows an exponential fit to the data  
831 points. (G) Boxplot compares ratiometric values for all cell types both in central brain  
832 and optic lobe (n=4). (H) Exposure to hyperoxia has a stronger effect in neuroblasts  
833 than in neuroepithelial cells of the IPC and OPC (n=6). (I) illustrates cell type specific  
834 hypoxia response in the central brain and optic lobe based on biosensor data. Scale  
835 bar 40  $\mu\text{m}$ . Error bars in (F) show S.E.M. \*  $p < 0.05$ , \*\*  $p < 0.01$ , \*\*\*  $p < 0.001$  student t-test  
836 or Mann-Whitney Wilcoxon test.

# Figure 1

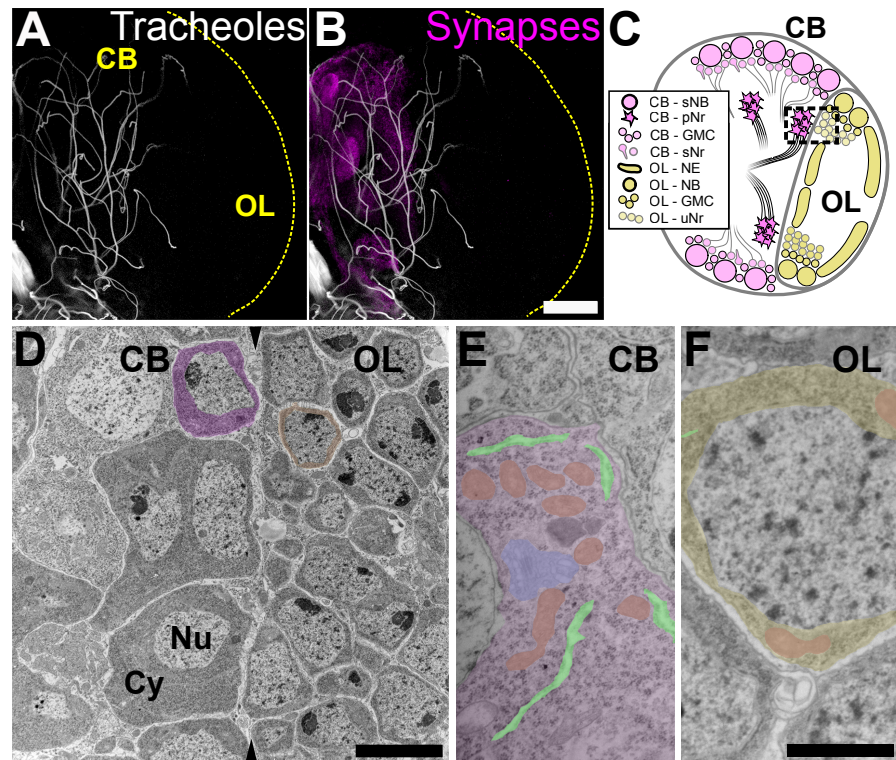

Figure 2

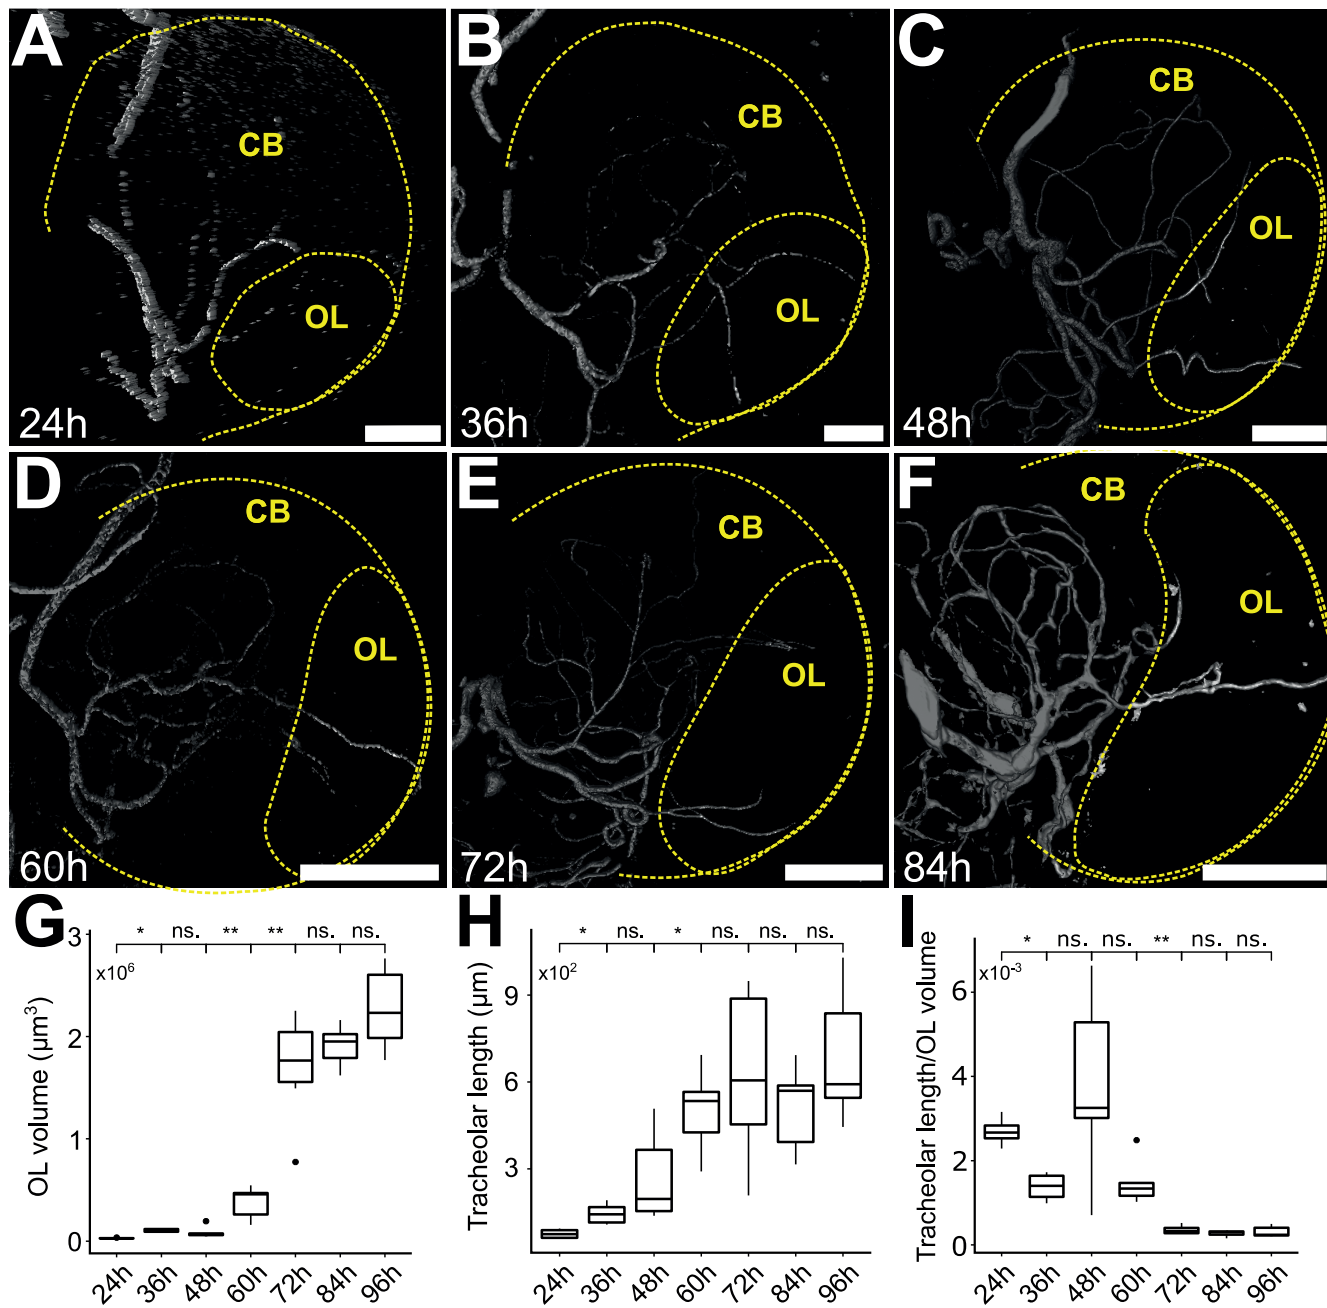



Figure 3

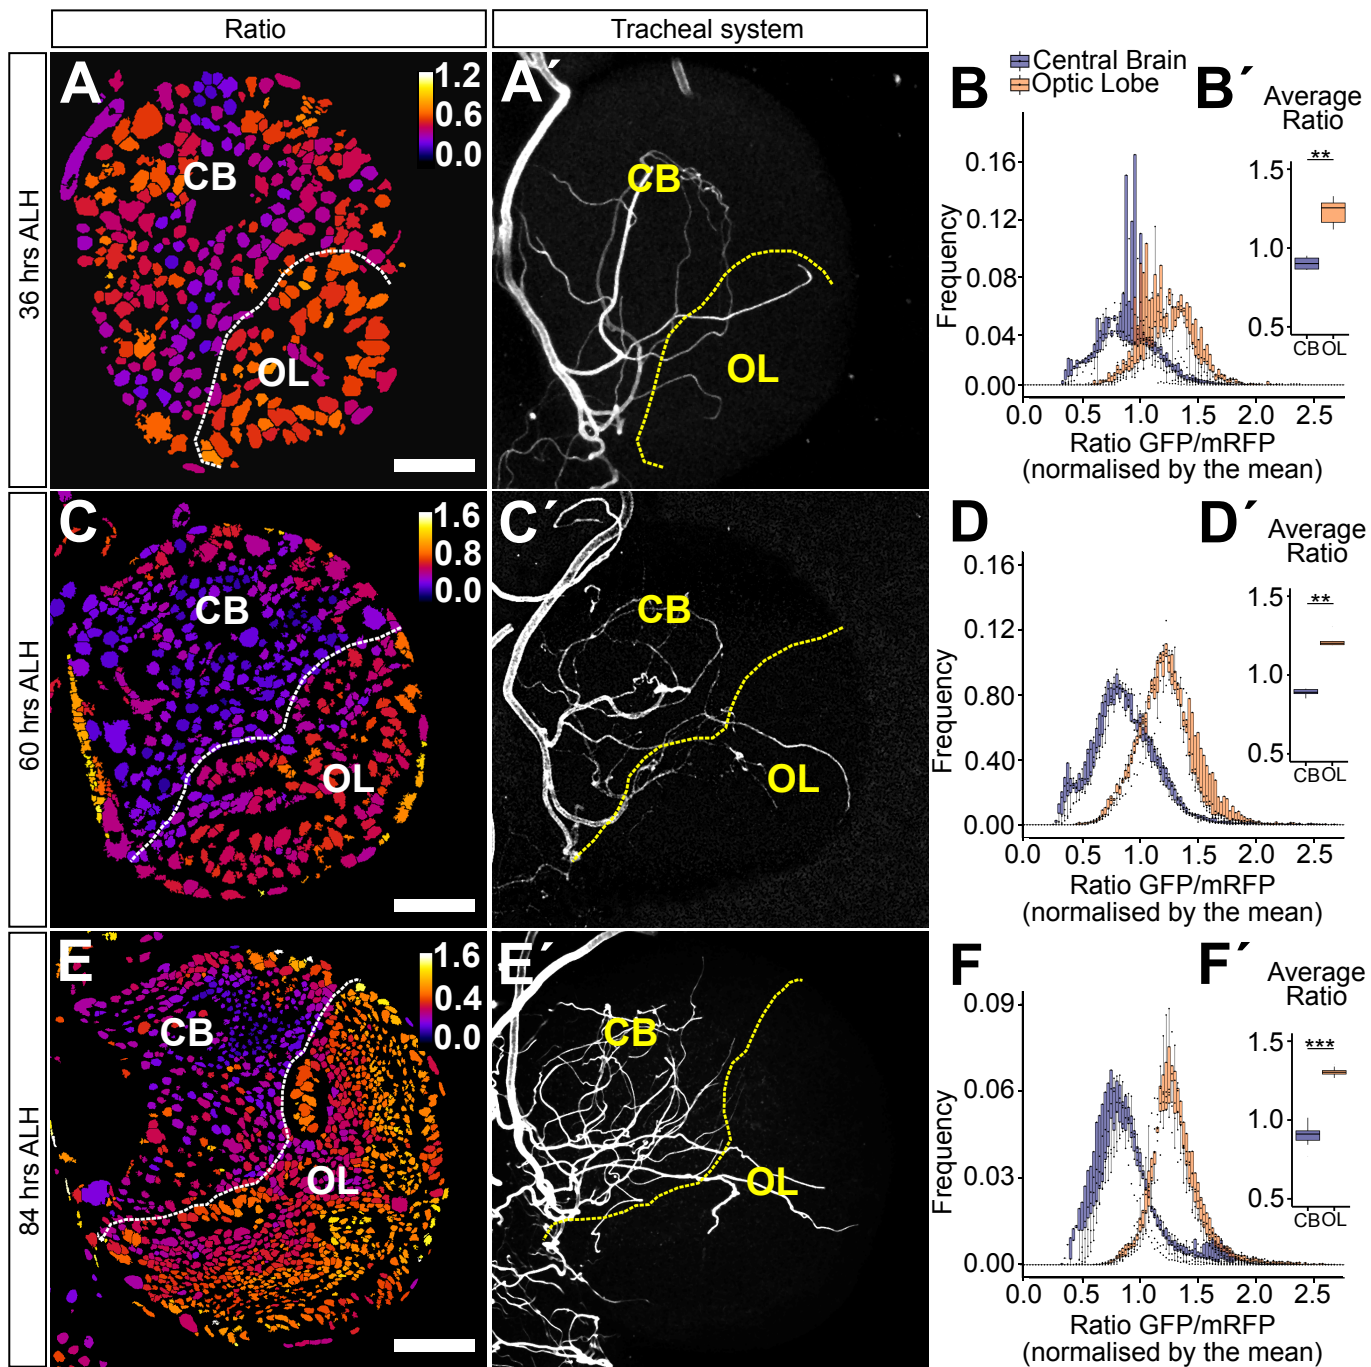

# Figure 4

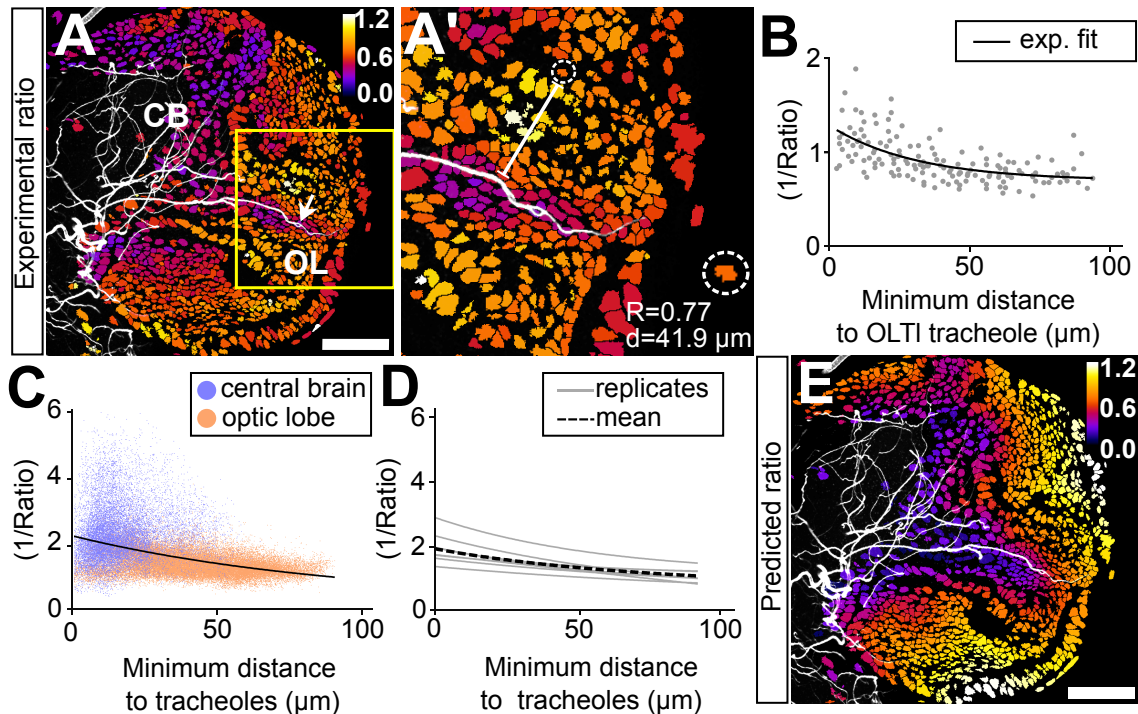

# Figure 5

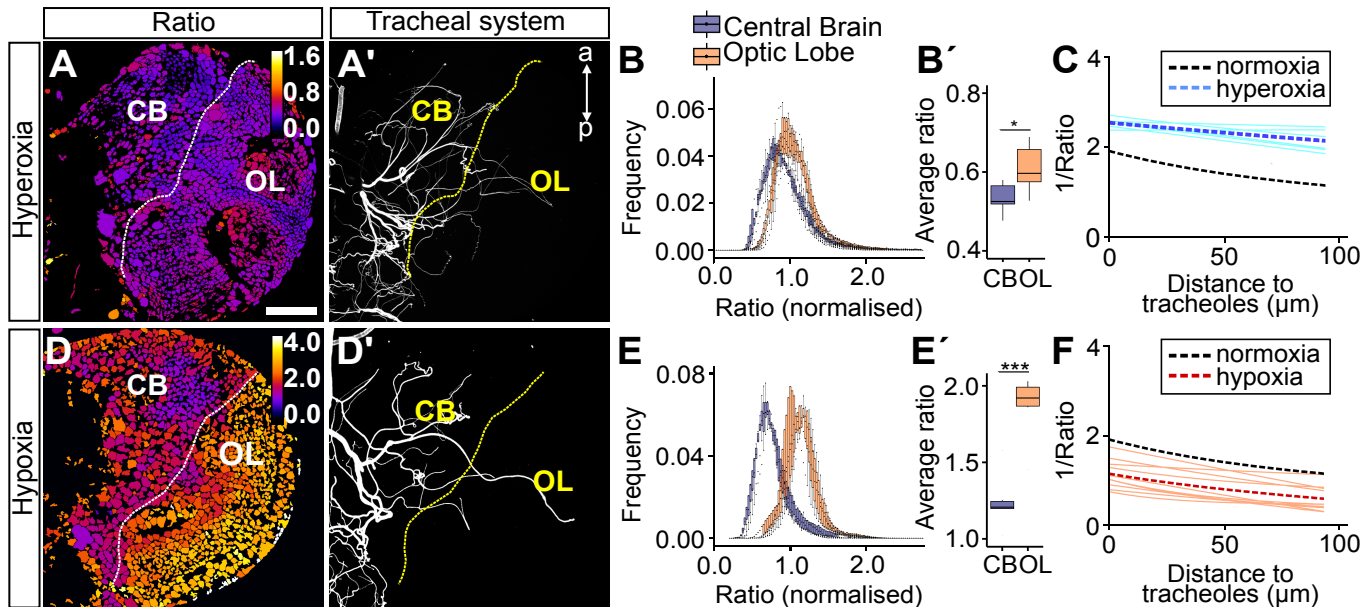



# Figure 6

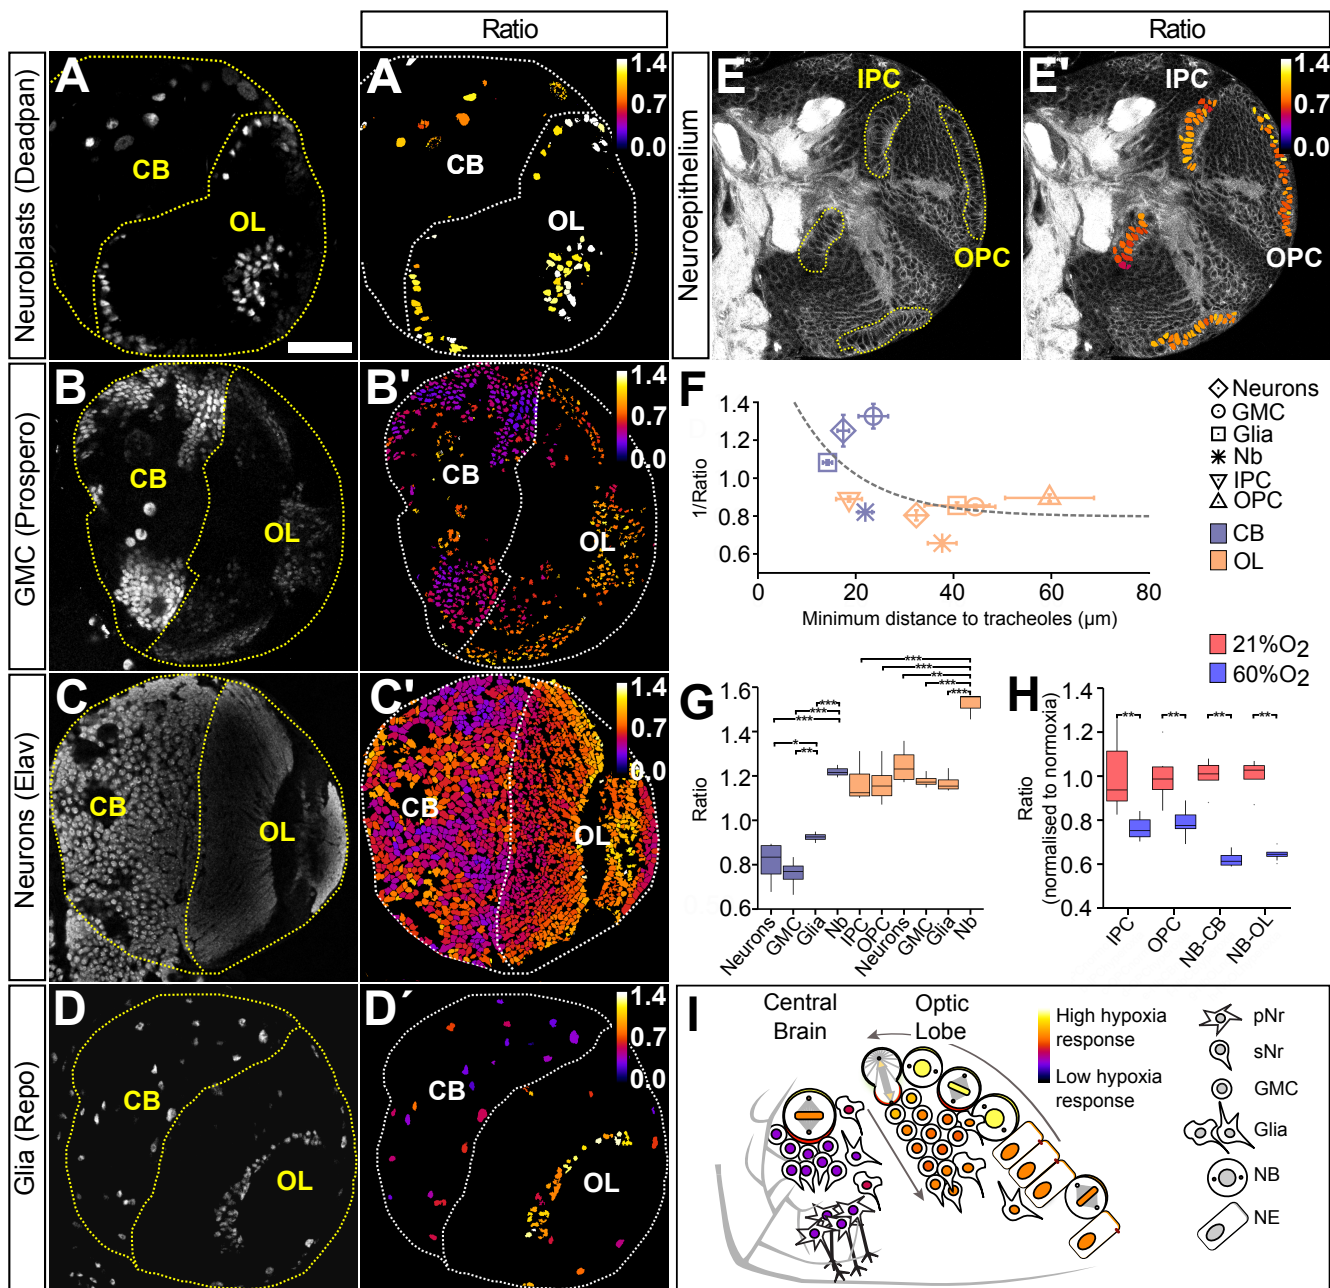

**Table 1. Functional Enrichment Analysis**

| <i>Biological process</i> | <i>Cell type</i> | <i>Enriched</i> | <i>p-value</i>       |
|---------------------------|------------------|-----------------|----------------------|
| Glycolysis                | NE               | YES             | $6.9 \times 10^{-3}$ |
|                           | NB               | YES             | $3.9 \times 10^{-2}$ |
| Hypoxic response          | NE               | NO              | >0.05                |
|                           | NB               | YES             | $9.3 \times 10^{-4}$ |

NE: Neuroepithelial cells.  
NB: Neuroblasts.
